# Supplementary material
Source: PubMed Central journal article supplement (PMC1539131)
Supplement: eukcell_5_8_1388__1.pdf [file eukcell_5_8_1388__1.pdf]

## Supplemental\_Data

## Genes repressed by overexpression of DhGzf3 in synthetic medium (ND, no data or signal too low))

| ypd_ID  | Gene Name | DhGZF3 vs<br>wt synthetic<br>med (log2) | DhGZF3 vs<br>wt YPD med<br>(log2) | Description                                                                                                                                                                                                         |
|---------|-----------|-----------------------------------------|-----------------------------------|---------------------------------------------------------------------------------------------------------------------------------------------------------------------------------------------------------------------|
| YGR125W |           | -3.42                                   | -0.29                             | Hypothetical ORF                                                                                                                                                                                                    |
| YIR034C | LYS1      | -3.13                                   | 0.53                              | saccharopine dehydrogenase                                                                                                                                                                                          |
| YJL153C | INO1      | -2.92                                   | ND                                | L-myo-inositol-1-phosphate synthase                                                                                                                                                                                 |
| YDL182W | LYS20     | -2.82                                   | 0.15                              | YDL131W (LYS21) homolog homocitrate synthase                                                                                                                                                                        |
| YAR064W |           | -2.68                                   | ND                                | Hypothetical ORF                                                                                                                                                                                                    |
| YJL170C | ASG7      | -2.63                                   | -1.98                             | an a-specific gene that is induced to a higher expression level<br>by alpha factor                                                                                                                                  |
| YIL160C | POT1      | -2.56                                   | 0.45                              | 3-oxoacyl CoA thiolase                                                                                                                                                                                              |
| YNR050C | LYS9      | -2.52                                   | 0.30                              | Seventh step in lysine biosynthesis pathway                                                                                                                                                                         |
| YBR291C | CTP1      | -2.47                                   | -0.03                             | citrate transporter                                                                                                                                                                                                 |
| YJL200C |           | -2.46                                   | 0.24                              | Hypothetical ORF                                                                                                                                                                                                    |
| YJL195C |           | -2.42                                   | ND                                | Protein required for cell viability                                                                                                                                                                                 |
| YIL094C | LYS12     | -2.41                                   | 0.38                              | homo-isocitrate dehydrogenase                                                                                                                                                                                       |
| YOR341W | RPA190    | -2.37                                   | -2.62                             | RNA polymerase I subunit                                                                                                                                                                                            |
| YBR072W | HSP26     | -2.34                                   | 0.88                              | heat shock protein 26                                                                                                                                                                                               |
| YDR234W | LYS4      | -2.31                                   | 0.28                              | homoaconitase                                                                                                                                                                                                       |
| YIR032C | DAL3      | -2.27                                   | ND                                | ureidoglycolate hydrolase                                                                                                                                                                                           |
| YKL070W |           | -2.26                                   | ND                                | Hypothetical ORF                                                                                                                                                                                                    |
| YGR031W |           | -2.18                                   | -2.30                             | Hypothetical ORF                                                                                                                                                                                                    |
| YCR098C | GIT1      | -2.13                                   | -0.85                             | permease involved in the uptake of glycerophosphoinositol<br>(GroPIns)                                                                                                                                              |
| YEL021W | URA3      | -2.06                                   | -3.05                             | orotidine-5'-phosphate decarboxylase                                                                                                                                                                                |
| YHR082C | KSP1      | -2.04                                   | -2.52                             | Serine/threonine kinase similar to casein kinase II and other<br>serine/threonine protein kinases                                                                                                                   |
| YLR458W |           | -2.04                                   | ND                                | Protein required for cell viability                                                                                                                                                                                 |
| YBR018C | GAL7      | -2.02                                   | ND                                | galactose-1-phosphate uridyl transferase                                                                                                                                                                            |
| YDR461W | MFA1      | -2.00                                   | ND                                | a-factor mating pheromone precursor                                                                                                                                                                                 |
| YNL142W | MEP2      | -1.93                                   | -0.04                             | ammonia transport protein                                                                                                                                                                                           |
| YJR150C | DAN1      | -1.91                                   | -1.44                             | cell wall mannoprotein induced during anaerobic growth                                                                                                                                                              |
| YKR039W | GAP1      | -1.88                                   | -0.34                             | general amino acid permease                                                                                                                                                                                         |
| YLR081W | GAL2      | -1.87                                   | ND                                | galactose permease                                                                                                                                                                                                  |
| YOR387C |           | -1.80                                   | ND                                | Hypothetical ORF                                                                                                                                                                                                    |
| YBR115C | LYS2      | -1.79                                   | 0.32                              | alpha aminoadipate reductase                                                                                                                                                                                        |
| YHL043W | ECM34     | -1.78                                   | -2.30                             | Non-essential protein of unknown function                                                                                                                                                                           |
| YEL072W | RMD6      | -1.76                                   | ND                                | Protein required for sporulation                                                                                                                                                                                    |
| YGL028C | SCW11     | -1.73                                   | -1.57                             | glucanase                                                                                                                                                                                                           |
| YOR203W |           | -1.72                                   | -0.95                             | Protein required for cell viability                                                                                                                                                                                 |
| YCR105W | ADH7      | -1.72                                   | ND                                | medium chain alcohol dehydrogenase                                                                                                                                                                                  |
| YDR535C |           | -1.71                                   | ND                                | Hypothetical ORF                                                                                                                                                                                                    |
| YML100W | TSL1      | -1.71                                   | ND                                | similar to TPS3 gene product trehalose-6-phosphate<br>synthase/phosphatase complex 123 kDa regulatory subunit                                                                                                       |
| YDR070C | FMP16     | -1.70                                   | -1.64                             | The authentic, non-tagged protein was localized to the<br>mitochondria                                                                                                                                              |
| YDR355C |           | -1.69                                   | -1.03                             | Protein required for cell viability                                                                                                                                                                                 |
| YLR142W | PUT1      | -1.68                                   | ND                                | proline oxidase                                                                                                                                                                                                     |
| YPL082C | MOT1      | -1.68                                   | -2.04                             | helicase (putative)                                                                                                                                                                                                 |
| YDR220C |           | -1.65                                   | -1.38                             | Hypothetical ORF                                                                                                                                                                                                    |
| YGR059W | SPR3      | -1.63                                   | -1.92                             | a sporulation-specific homologue of the yeast CDC3/10/11/12<br>family of bud neck microfilament genes; regulated by ABFI                                                                                            |
| YLR004C |           | -1.63                                   | -1.36                             | Hypothetical ORF                                                                                                                                                                                                    |
| YMR111C |           | -1.63                                   | -0.33                             | Hypothetical ORF                                                                                                                                                                                                    |
| YOL166C |           | -1.63                                   | ND                                | Hypothetical ORF                                                                                                                                                                                                    |
| YML099C | ARG81     | -1.62                                   | -1.62                             | zinc finger transcription factor of the Zn(2)-Cys(6) binuclear<br>cluster domain type                                                                                                                               |
| YBR184W |           | -1.60                                   | ND                                | Hypothetical ORF                                                                                                                                                                                                    |
| YOR348C | PUT4      | -1.60                                   | ND                                | proline specific permease                                                                                                                                                                                           |
| YER085C |           | -1.59                                   | -1.72                             | Hypothetical ORF                                                                                                                                                                                                    |
| YDR090C |           | -1.57                                   | -1.58                             | Hypothetical ORF                                                                                                                                                                                                    |
| YLR227C | ADY4      | -1.57                                   | -0.37                             | Component of the meiotic outer plaque, a membrane-<br>organizing center that assembles on the cytoplasmic face of<br>the spindle pole body during meiosis II and triggers the<br>formation of the prospore membrane |
| YKR105C |           | -1.56                                   | ND                                | Hypothetical ORF                                                                                                                                                                                                    |

## Supplemental\_Data

|         |       |       |       |                                                                                                                                                                                                                                                  |
|---------|-------|-------|-------|--------------------------------------------------------------------------------------------------------------------------------------------------------------------------------------------------------------------------------------------------|
| YGL258W |       | -1.54 | 0.24  | Increased in velum formation in flor strain                                                                                                                                                                                                      |
| YJL110C | GZF3  | -1.52 | -0.36 | GATA zinc finger protein 3 homologous to Dal80 in structure and function                                                                                                                                                                         |
| YBR128C | ATG14 | -1.51 | -1.52 | Required for autophagy                                                                                                                                                                                                                           |
| YGR121C | MEP1  | -1.50 | -0.55 | ammonia permease                                                                                                                                                                                                                                 |
| YHL042W |       | -1.50 | -1.76 | Hypothetical ORF                                                                                                                                                                                                                                 |
| YDR016C | DAD1  | -1.48 | -0.97 | Duo1 And Dam1 interacting; localized to intranuclear spindles and spindle pole bodies                                                                                                                                                            |
| YJL038C |       | -1.47 | ND    | Hypothetical ORF                                                                                                                                                                                                                                 |
| YOR391C | HSP33 | -1.47 | -0.99 | Possible chaperone and cysteine protease with similarity to E. coli Hsp31 and S. cerevisiae Hsp32p, Hsp33p, and Sno4p; member of the DJ-1/ThiJ/Pfpl superfamily, which includes human DJ-1 involved in Parkinson's disease                       |
| YEL070W | DSF1  | -1.46 | ND    | Hypothetical ORF                                                                                                                                                                                                                                 |
| YBL089W | AVT5  | -1.46 | ND    | transporter                                                                                                                                                                                                                                      |
| YMR306W | FKS3  | -1.46 | -1.85 | Protein of unknown function, has similarity to 1,3-beta-D-glucan synthase catalytic subunits Fks1p and Gsc2p                                                                                                                                     |
| YJL113W |       | -1.46 | -1.50 | TyB Gag-Pol protein; proteolytically processed to make the Gag, RT, PR, and IN proteins that are required for retrotransposition                                                                                                                 |
| YCL048W |       | -1.46 | -1.62 | Hypothetical ORF                                                                                                                                                                                                                                 |
| YBL112C |       | -1.45 | -1.18 | Hypothetical ORF                                                                                                                                                                                                                                 |
| YMR053C | STB2  | -1.44 | -2.33 | binds Sin3p in two-hybrid assay and is part of large protein complex with Sin3p and Stb1p                                                                                                                                                        |
| YML047C | PRM6  | -1.44 | -1.12 | Pheromone-regulated protein, predicted to have 2 transmembrane segments; regulated by Ste12p during mating                                                                                                                                       |
| YOR300W |       | -1.44 | -1.26 | Hypothetical ORF                                                                                                                                                                                                                                 |
| YPL280W | HSP32 | -1.43 | -1.71 | Possible chaperone and cysteine protease with similarity to E. coli Hsp31 and S. cerevisiae Hsp31p, Hsp33p, and Sno4p; member of the DJ-1/ThiJ/Pfpl superfamily, which includes human DJ-1 involved in Parkinson's disease                       |
| YDL196W |       | -1.42 | -2.41 | Protein required for cell viability                                                                                                                                                                                                              |
| YDL169C | UGX2  | -1.42 | ND    | Product of gene unknown                                                                                                                                                                                                                          |
| YDR480W | DIG2  | -1.42 | -1.37 | MAP kinase-associated protein                                                                                                                                                                                                                    |
| YER096W | SHC1  | -1.41 | -1.23 | Sporulation-specific activator of Chs3p (chitin synthase III), required for the synthesis of the chitosan layer of ascospores; has similarity to Skt5p, which activates Chs3p during vegetative growth; transcriptionally induced at alkaline pH |
| YFL066C |       | -1.41 | -1.32 | Hypothetical ORF                                                                                                                                                                                                                                 |
| YDR139C | RUB1  | -1.40 | -0.57 | ubiquitin-like protein                                                                                                                                                                                                                           |
| YAL018C |       | -1.39 | -1.29 | Hypothetical ORF                                                                                                                                                                                                                                 |
| YLR054C | OSW2  | -1.39 | ND    | Outer Spore Wall                                                                                                                                                                                                                                 |
| YKR097W | PCK1  | -1.39 | ND    | phosphoenolpyruvate carboxylkinase                                                                                                                                                                                                               |
| YCR095C |       | -1.39 | ND    | Hypothetical ORF                                                                                                                                                                                                                                 |
| YMR113W | FOL3  | -1.39 | -0.11 | dihydrofolate synthetase                                                                                                                                                                                                                         |
| YEL041W |       | -1.38 | -1.21 | Hypothetical ORF                                                                                                                                                                                                                                 |
| YBR285W |       | -1.37 | ND    | Hypothetical ORF                                                                                                                                                                                                                                 |
| YGL128C | CWC23 | -1.36 | -0.98 | Complexed with Cef1p                                                                                                                                                                                                                             |
| YDL090C | RAM1  | -1.35 | 0.21  | farnesyltransferase beta subunit                                                                                                                                                                                                                 |
| YER103W | SSA4  | -1.34 | 0.16  | HSP70 family                                                                                                                                                                                                                                     |
| YFL021W | GAT1  | -1.33 | -0.59 | transcriptional activator with GATA-1-type Zn finger DNA-binding motif                                                                                                                                                                           |
| YBR116C |       | -1.33 | ND    | Hypothetical ORF                                                                                                                                                                                                                                 |
| YBR050C | REG2  | -1.33 | -1.91 | Glc7p regulatory subunit                                                                                                                                                                                                                         |
| YMR017W | SPO20 | -1.33 | ND    | SNAP 25 homolog                                                                                                                                                                                                                                  |
| YIL164C | NIT1  | -1.33 | -0.15 | nitrilase                                                                                                                                                                                                                                        |
| YGR154C |       | -1.32 | -1.21 | Hypothetical ORF                                                                                                                                                                                                                                 |
| YGR004W | PEX31 | -1.32 | -0.80 | Peroxisomal integral membrane protein, involved in negative regulation of peroxisome size; partially functionally redundant with Pex30p and Pex32p; probably acts at a step downstream of steps mediated by Pex28p and Pex29p                    |
| YIL167W | SDL1  | -1.32 | -0.55 | Hypothetical ORF                                                                                                                                                                                                                                 |
| YGL138C |       | -1.31 | -2.06 | Hypothetical ORF                                                                                                                                                                                                                                 |
| YIR041W |       | -1.30 | ND    | Hypothetical ORF                                                                                                                                                                                                                                 |
| YIL104C | SHQ1  | -1.30 | -0.61 | Essential nuclear protein, required for accumulation of box H/ACA snoRNAs and for rRNA processing; interacts with Naf1p                                                                                                                          |
| YEL063C | CAN1  | -1.30 | -0.10 | arginine permease                                                                                                                                                                                                                                |

## Supplemental\_Data

|         |       |       |       |                                                                                                                                                                                                           |
|---------|-------|-------|-------|-----------------------------------------------------------------------------------------------------------------------------------------------------------------------------------------------------------|
| YEL004W | YEA4  | -1.29 | -1.30 | Shows sequence similarity to GOG5, a gene involved in vanadate resistance                                                                                                                                 |
| YBR201W | DER1  | -1.28 | ND    | Endoplasmic reticulum membrane protein, required for the protein degradation process associated with the ER, involved in the retrograde transport of misfolded or unassembled proteins                    |
| YCL061C | MRC1  | -1.28 | -1.01 | Mediator of the Replication Checkpoint; required for full activation of Rad53p in response to replication stress.                                                                                         |
| YML130C | ERO1  | -1.28 | 0.25  | Glycoprotein required for oxidative protein folding in the endoplasmic reticulum                                                                                                                          |
| YIR030C | DCG1  | -1.28 | -0.27 | Protein of unknown function, expression is sensitive to nitrogen catabolite repression and regulated by Dal80p; contains transmembrane domain                                                             |
| YDR290W |       | -1.28 | ND    | Dubious open reading frame, unlikely to encode a protein; not conserved in closely related Saccharomyces species; 42% of ORF overlaps the verified gene RTT103; deletion causes hydroxvuracil sensitivity |
| YJL075C |       | -1.27 | ND    | Dubious open reading frame, unlikely to encode a protein; not conserved in closely related Saccharomyces species; 85% of ORF overlaps the verified gene NET1                                              |
| YFR055W |       | -1.27 | -0.02 | Hypothetical ORF                                                                                                                                                                                          |
| YBR218C | PYC2  | -1.27 | -1.02 | pyruvate carboxylase                                                                                                                                                                                      |
| YER038C | KRE29 | -1.27 | -0.80 | Killer toxin RESistant                                                                                                                                                                                    |
| YJL219W | HXT9  | -1.27 | ND    | hexose permease                                                                                                                                                                                           |
| YGR239C | PEX21 | -1.27 | -0.14 | peroxin                                                                                                                                                                                                   |
| YPR116W |       | -1.27 | -0.83 | Hypothetical ORF                                                                                                                                                                                          |
| YIL121W | QDR2  | -1.27 | -0.26 | plasma membrane transporter                                                                                                                                                                               |
| YFL007W | BLM3  | -1.26 | -0.88 | involved in protecting the cell against bleomycin damage                                                                                                                                                  |
| YGR142W | BTN2  | -1.25 | 0.00  | Gene/protein whose expression is elevated in a btn1 minus/Btn1p lacking yeast strain.                                                                                                                     |
| YLR171W |       | -1.24 | -0.39 | Hypothetical ORF                                                                                                                                                                                          |
| YDL131W | LYS21 | -1.23 | -0.14 | YDL182W (LYS20) homolog/homocitrate synthase                                                                                                                                                              |
| YKL115C |       | -1.21 | -0.76 | Hypothetical ORF                                                                                                                                                                                          |
| YGL033W | HOP2  | -1.21 | -1.80 | meiosis-specific gene required for the pairing of similar chromosomes                                                                                                                                     |
| YDR340W |       | -1.20 | -0.89 | Hypothetical ORF                                                                                                                                                                                          |
| YFL040W |       | -1.20 | -0.77 | Hypothetical ORF                                                                                                                                                                                          |
| YNL332W | THI12 | -1.19 | ND    | thiamine regulated gene, homologous to nmt1a in Schizosaccharomyces pombe; putatively involved in pyrimidine biosynthesis                                                                                 |
| YML107C |       | -1.19 | -0.12 | Protein of unknown function; green fluorescent protein (GFP)-fusion protein localizes to the nuclear periphery                                                                                            |
| YIL166C |       | -1.19 | 0.33  | Hypothetical ORF, member of the Dal5p subfamily of the major facilitator family                                                                                                                           |
| YBL031W | SHE1  | -1.18 | -0.66 | Cytoskeletal protein of unknown function; overexpression causes growth arrest                                                                                                                             |
| YKL191W | DPH2  | -1.18 | -0.09 | Protein of unknown function, involved in diphtheria toxicity and diphthamide biosynthesis, not essential for viability                                                                                    |
| YOL031C | SIL1  | -1.17 | 0.18  | Nucleotide exchange factor                                                                                                                                                                                |
| YEL064C | AVT2  | -1.16 | -0.85 | transporter                                                                                                                                                                                               |
| YDR034C | LYS14 | -1.16 | 0.20  | Transcriptional activator of lysine pathway genes with 2-aminoadipate semialdehyde as co-inducer; saccharopine reductase synthesis                                                                        |
| YHL035C | VMR1  | -1.16 | -1.08 | ABC transporter                                                                                                                                                                                           |
| YFL062W | COS4  | -1.14 | ND    | Protein of unknown function, member of a family of conserved, often subtelomerically-encoded proteins                                                                                                     |
| YDR540C |       | -1.14 | -0.79 | Hypothetical ORF                                                                                                                                                                                          |
| YAL064W |       | -1.13 | -0.89 | Hypothetical ORF                                                                                                                                                                                          |
| YGL156W | AMS1  | -1.13 | ND    | alpha mannosidase                                                                                                                                                                                         |
| YGR212W | SLI1  | -1.13 | ND    | Hypothetical ORF                                                                                                                                                                                          |
| YBL074C | AAR2  | -1.12 | -1.10 | Component of the U5 snRNP, required for splicing of U3 precursors; originally described as a splicing factor specifically required for splicing pre-mRNA of the MATa1 cistron                             |
| YLR136C | TIS11 | -1.11 | ND    | Zinc finger containing homolog of mammalian TIS11, glucose repressible gene                                                                                                                               |
| YNL183C | NPR1  | -1.11 | -0.37 | protein kinase homolog                                                                                                                                                                                    |
| YIL001W |       | -1.10 | -0.45 | Hypothetical ORF                                                                                                                                                                                          |
| YBR147W |       | -1.10 | -0.14 | Hypothetical ORF                                                                                                                                                                                          |
| YJL043W |       | -1.10 | -0.80 | Hypothetical ORF                                                                                                                                                                                          |

## Supplemental\_Data

|         |       |       |       |                                                                                                                                                                                                                                                 |
|---------|-------|-------|-------|-------------------------------------------------------------------------------------------------------------------------------------------------------------------------------------------------------------------------------------------------|
| YIL150C | MCM10 | -1.09 | -0.17 | Protein required for S-phase (DNA synthesis) initiation or completion                                                                                                                                                                           |
| YGL018C | JAC1  | -1.09 | ND    | E. coli Hsc20 co-chaperone protein homolog J-protein co-chaperone family 20 kDa                                                                                                                                                                 |
| YEL076C |       | -1.09 | -1.26 | Hypothetical ORF                                                                                                                                                                                                                                |
| YAL028W | FRT2  | -1.09 | -1.33 | Exhibits physical and genetic interactions with FRT1 and genetic interactions with TCP1; contains a C-terminal transmembrane domain and shows localization to the plasma membrane, the ER, and cytoplasmic vesicular or granule-like structures |
| YDR428C |       | -1.08 | -1.08 | Hypothetical ORF                                                                                                                                                                                                                                |
| YJL144W |       | -1.08 | -0.83 | Hypothetical ORF                                                                                                                                                                                                                                |
| YPL166W |       | -1.07 | -0.51 | Protein of unknown function; green fluorescent protein (GFP)-fusion protein localizes to the cytoplasm in a punctate pattern                                                                                                                    |
| YMR040W | YET2  | -1.06 | ND    | homolog of mammalian BAP31                                                                                                                                                                                                                      |
| YDR123C | INO2  | -1.06 | -0.58 | helix-loop-helix protein                                                                                                                                                                                                                        |
| YOR191W | RIS1  | -1.06 | ND    | SWI2/SNF2 DNA-dependent ATPase family member (putative)                                                                                                                                                                                         |
| YLR423C | ATG17 | -1.05 | -0.15 | required for activation of App1 protein kinase                                                                                                                                                                                                  |
| YGR101W | PCP1  | -1.05 | -0.59 | rhomboid protease                                                                                                                                                                                                                               |
| YLR211C |       | -1.04 | -0.89 | Hypothetical ORF                                                                                                                                                                                                                                |
| YMR170C | ALD2  | -1.03 | -0.34 | aldehyde dehydrogenase                                                                                                                                                                                                                          |
| YGL045W | RIM8  | -1.03 | -0.65 | Regulator of IME2 (RIM) Involved in proteolytic processing of Rim1p                                                                                                                                                                             |
| YDR114C |       | -1.02 | -0.74 | Hypothetical ORF                                                                                                                                                                                                                                |
| YJR097W | JJJ3  | -1.02 | -0.29 | Protein that may function as a cochaperone, as suggested by the presence of a DnaJ-like domain                                                                                                                                                  |
| YCL069W |       | -1.02 | -0.65 | Hypothetical ORF                                                                                                                                                                                                                                |
| YLL063C | AYT1  | -1.01 | ND    | Acetyltransferase; catalyzes trichothecene 3-O-acetylation, suggesting a possible role in trichothecene biosynthesis                                                                                                                            |
| YER037W | PHM8  | -1.01 | -0.42 | Protein of unknown function, expression is induced by low phosphate levels and by inactivation of Pho85p                                                                                                                                        |
| YGL175C | SAE2  | -1.00 | -0.65 | Involved in meiotic recombination and chromosome metabolism                                                                                                                                                                                     |
| YJR140C | HIR3  | -1.00 | -0.87 | Transcriptional corepressor involved in the cell cycle-regulated transcription of histone genes HTA1, HTB1, HHT1, and HHT2; involved in position-dependent gene silencing and nucleosome reassembly                                             |

### Genes induced by overexpression of DhGzf3 in synthetic medium

| ypd_ID  | Gene Name | DhGZF3 vs wt synthetic med (log2) | DhGZF3 vs wt YPD med (log2) | Description                                                                                                      |
|---------|-----------|-----------------------------------|-----------------------------|------------------------------------------------------------------------------------------------------------------|
| YKL216W | URA1      | 1.97                              | 0.04                        | dihydroorotate dehydrogenase                                                                                     |
| YMR011W | HXT2      | 1.80                              | ND                          | high affinity hexose transporter-2                                                                               |
| YEL039C | CYC7      | 1.69                              | ND                          | iso-2-cytochrome c                                                                                               |
| YJR048W | CYC1      | 1.69                              | 0.83                        | iso-1-cytochrome c                                                                                               |
| YOL126C | MDH2      | 1.53                              | 0.25                        | malate dehydrogenase                                                                                             |
| YOR028C | CIN5      | 1.45                              | ND                          | bZIP (basic-leucine zipper) protein can activate transcription from a promoter containing a Yap recognition site |
| YER076C |           | 1.42                              | 0.10                        | Hypothetical ORF                                                                                                 |
| YOL036W |           | 1.41                              | ND                          | Protein of unknown function; potential Cdc28p substrate                                                          |
| YJL130C | URA2      | 1.41                              | 0.08                        | aspartate transcarbamylase carbamoyl phosphate synthetase glutamine amidotransferase                             |
| YAR073W | IMD1      | 1.39                              | 0.83                        | IMP dehydrogenase homolog                                                                                        |
| YBL075C | SSA3      | 1.36                              | 0.22                        | heat shock protein of HSP70 family                                                                               |
| YER067W |           | 1.33                              | 0.26                        | Hypothetical ORF                                                                                                 |
| YAR010C |           | 1.33                              | -0.02                       | TyA Gag protein; the main structural constituent of virus-like particles (VLPs)                                  |
| YHL036W | MUP3      | 1.31                              | -0.74                       | very low affinity methionine permease                                                                            |
| YJR026W |           | 1.31                              | 0.04                        | TyA Gag protein; the main structural constituent of virus-like particles (VLPs)                                  |
| YML040W |           | 1.29                              | -0.12                       | TyA Gag protein; the main structural constituent of virus-like particles (VLPs)                                  |
| YFR015C | GSY1      | 1.28                              | ND                          | glycogen synthase (UDP-glucose-starch glucosyltransferase)                                                       |
| YMR051C |           | 1.28                              | -0.11                       | TyA Gag protein; the main structural constituent of virus-like particles (VLPs)                                  |

## Supplemental\_Data

|         |        |      |       |                                                                                                                                                                                                                              |
|---------|--------|------|-------|------------------------------------------------------------------------------------------------------------------------------------------------------------------------------------------------------------------------------|
| YML045W |        | 1.27 | -0.12 | TyB Gag-Pol protein; proteolytically processed to make the Gag, RT, PR, and IN proteins that are required for retrotransposition                                                                                             |
| YJR028W |        | 1.24 | 0.02  | Ty ORF                                                                                                                                                                                                                       |
| YLR432W | IMD3   | 1.21 | 0.55  | IMP dehydrogenase homolog                                                                                                                                                                                                    |
| YJL084C |        | 1.20 | 0.22  | Cytoplasmic protein of unknown function that interacts with Pcl7p, phosphorylated in vitro; potential Cdc28p substrate                                                                                                       |
| YGR052W | FMP48  | 1.19 | ND    | The authentic, non-tagged protein was localized to the mitochondria                                                                                                                                                          |
| YOL143C | RIB4   | 1.18 | 0.36  | 6,7-dimethyl-8-ribityllumazine synthase (DMRL synthase)                                                                                                                                                                      |
| YOL041C | NOP12  | 1.17 | -0.05 | Nucleolar protein, required for pre-25S rRNA processing; contains an RNA recognition motif (RRM) and has similarity to Nop13p, Nsr1p, and putative orthologs in <i>Drosophila</i> and <i>S. pombe</i>                        |
| YMR046C |        | 1.15 | -0.11 | TyA Gag protein; the main structural constituent of virus-like particles (VLPs)                                                                                                                                              |
| YIL066C | RNR3   | 1.12 | 0.39  | ribonucleotide reductase, large (R1) subunit                                                                                                                                                                                 |
| YHR216W | IMD2   | 1.09 | 0.58  | IMP dehydrogenase homolog                                                                                                                                                                                                    |
| YKR075C |        | 1.08 | 0.06  | Protein of unknown function; similar to YOR062Cp and Reg1p; expression regulated by glucose and Rqt1p                                                                                                                        |
| YMR288W | HSH155 | 1.06 | 0.15  | U2-snRNP associated splicing factor that forms extensive associations with the branch site-3' splice site-3' exon region upon prespliceosome formation; ortholog of the mammalian U2 snRNP-associated splicing factor SAP155 |
| YKL109W | HAP4   | 1.04 | 0.38  | transcriptional activator protein of CYC1 (component of HAP2/HAP3 heteromer)                                                                                                                                                 |
| YGR243W | FMP43  | 0.99 | 0.30  | The authentic, non-tagged protein was localized to mitochondria                                                                                                                                                              |
| YDL079C | MRK1   | 0.99 | 0.18  | MDS1 related protein kinase                                                                                                                                                                                                  |
| YEL011W | GLC3   | 0.99 | ND    | 1,4-glucan-6-(1,4-glucano)-transferase                                                                                                                                                                                       |
| YDR074W | TPS2   | 0.98 | 0.07  | trehalose-6-phosphate phosphatase                                                                                                                                                                                            |
| YBR069C | TAT1   | 0.98 | 0.44  | amino acid transport protein for valine, leucine, isoleucine, and tyrosine                                                                                                                                                   |
| YMR068W | AVO2   | 0.97 | -0.06 | Component of a complex containing the Tor2p kinase and other proteins, which may have a role in regulation of cell growth                                                                                                    |
| YJR115W |        | 0.96 | -1.02 | Hypothetical ORF                                                                                                                                                                                                             |
| YLR106C | MDN1   | 0.95 | ND    | midasin                                                                                                                                                                                                                      |
| YDR343C | HXT6   | 0.94 | 0.60  | hexose transporter                                                                                                                                                                                                           |
| YMR153W | NUP53  | 0.93 | -0.08 | karyopherin docking complex component of the nuclear pore complex nuclear pore complex subunit                                                                                                                               |
| YBR068C | BAP2   | 0.93 | ND    | amino acid permease for leucine, valine, and isoleucine (putative)                                                                                                                                                           |
| YHR136C | SPL2   | 0.92 | -0.05 | Protein with similarity to cyclin-dependent kinase inhibitors, overproduction suppresses a <i>plc1</i> null mutation; green fluorescent protein (GFP)-fusion protein localizes to the cytoplasm in a punctate pattern        |
| YLL061W | MMP1   | 0.92 | 0.09  | high affinity S-methylmethionine permease                                                                                                                                                                                    |
| YBL004W | UTP20  | 0.91 | ND    | U3 snoRNP protein                                                                                                                                                                                                            |
| YGR269W |        | 0.91 | 0.29  | Hypothetical ORF                                                                                                                                                                                                             |
| YML056C | IMD4   | 0.90 | 0.20  | IMP dehydrogenase homolog                                                                                                                                                                                                    |
| YPL042C | SSN3   | 0.90 | 0.50  | cyclin (SSN8)-dependent serine/threonine protein kinase                                                                                                                                                                      |
| YOR273C | TPO4   | 0.89 | ND    | Polyamine transport protein                                                                                                                                                                                                  |
| YJL108C | PRM10  | 0.89 | 0.36  | Pheromone-regulated protein, predicted to have 5 transmembrane segments                                                                                                                                                      |
| YDL153C | SAS10  | 0.89 | ND    | U3 snoRNP protein                                                                                                                                                                                                            |
| YPR010C | RPA135 | 0.89 | -0.03 | RNA polymerase I subunit                                                                                                                                                                                                     |
| YER110C | KAP123 | 0.88 | -0.13 | karyopherin beta 4                                                                                                                                                                                                           |
| YOL113W | SKM1   | 0.88 | 0.15  | Serine/threonine protein kinase with similarity to Ste20p and Cla4p                                                                                                                                                          |
| YBR092C | PHO3   | 0.85 | -0.30 | acid phosphatase                                                                                                                                                                                                             |
